# Supplementary material
Source: PubMed Central journal article supplement (PMC7658587)
Supplement: NIHMS1644346-supplement-SI.pdf [file NIHMS1644346-supplement-SI.pdf]

## **Supporting Information**

### **The chemical synthesis of human milk oligosaccharides: lacto-*N*-neohexaose (Gal $\beta$ 1 $\rightarrow$ 4GlcNAc $\beta$ 1 $\rightarrow$ )<sub>2</sub> 3,6Gal $\beta$ 1 $\rightarrow$ 4Glc**

Mithila D. Bandara, Keith J. Stine, and Alexei V. Demchenko\*

*Department of Chemistry and Biochemistry, University of Missouri – St. Louis, One University Boulevard, St. Louis, Missouri 63121, USA; [demchenkoa@umsl.edu](mailto:demchenkoa@umsl.edu)*

## NMR Spectra

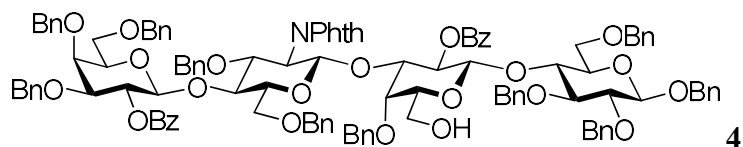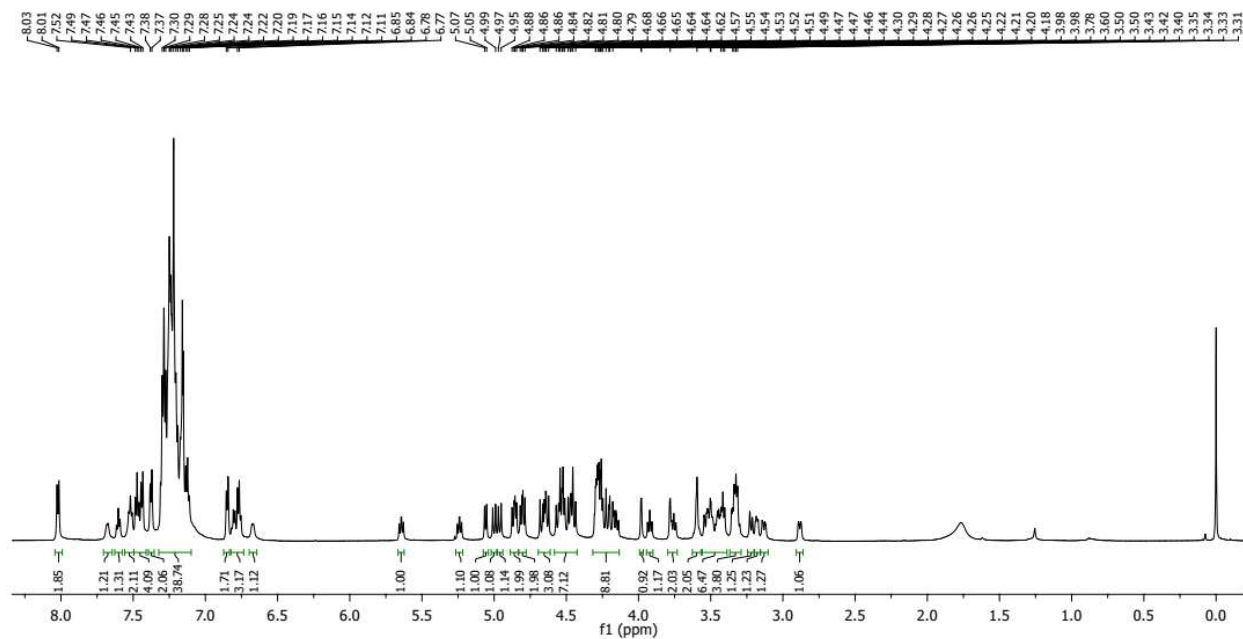

CDCl<sub>3</sub> 600 MHz

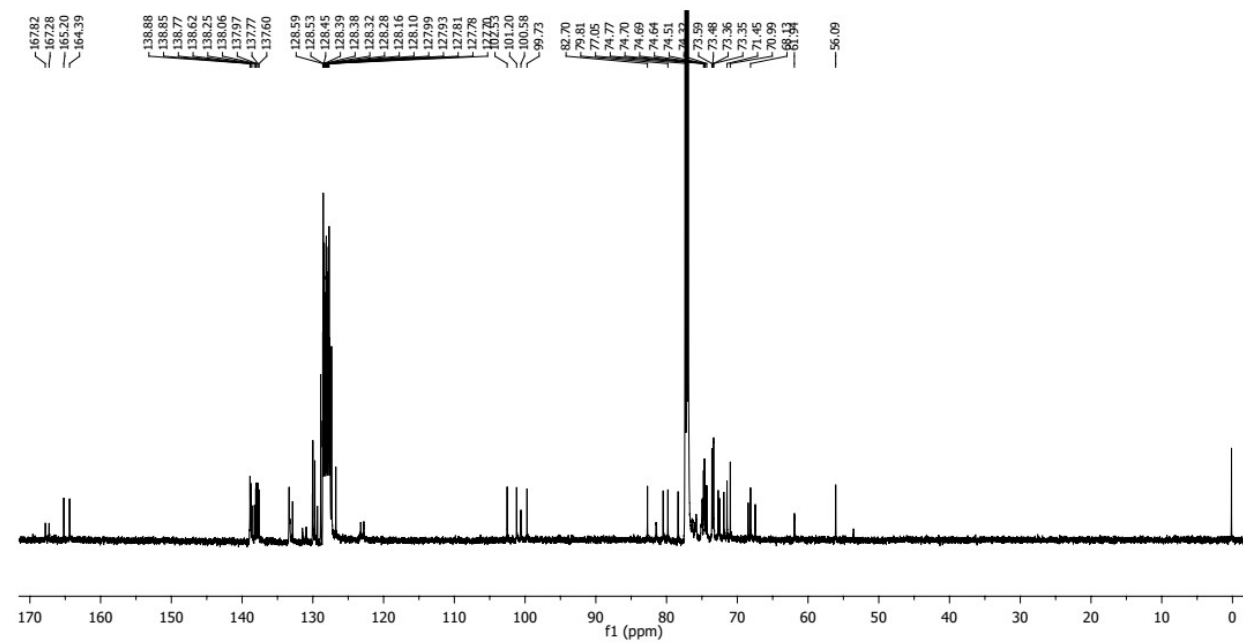

CDCl<sub>3</sub> 151 MHz

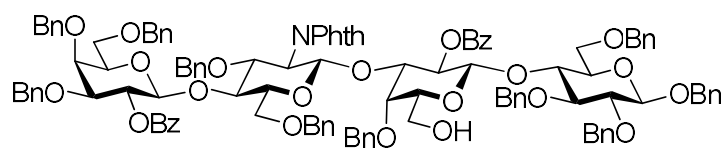

4

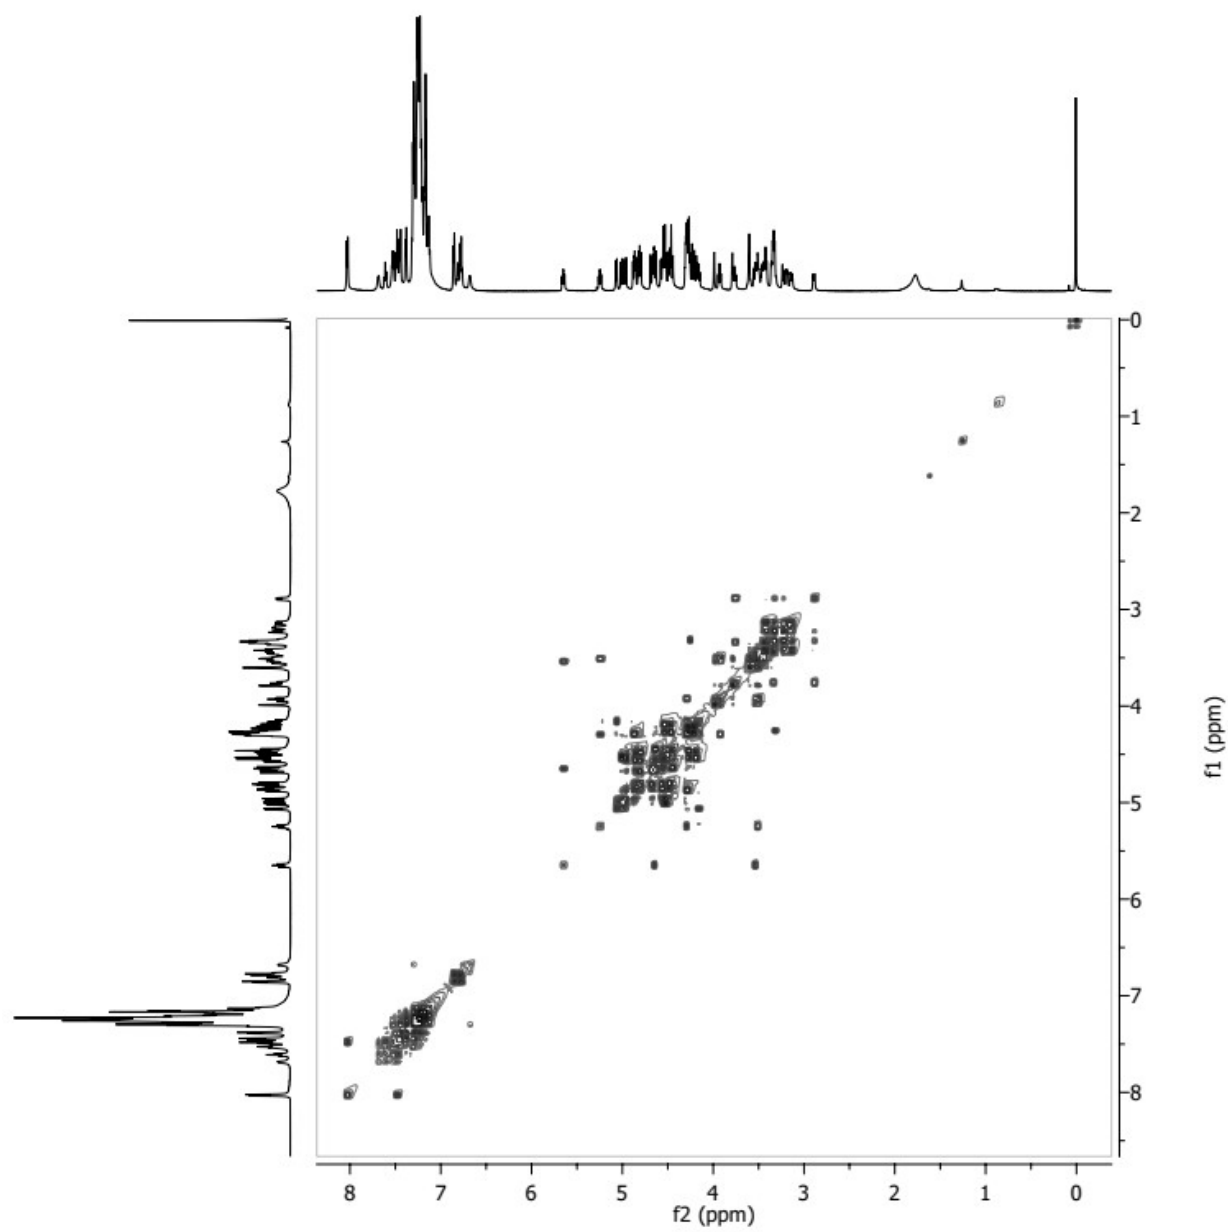

CDCl<sub>3</sub> 600 MHz

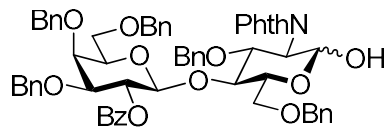

8

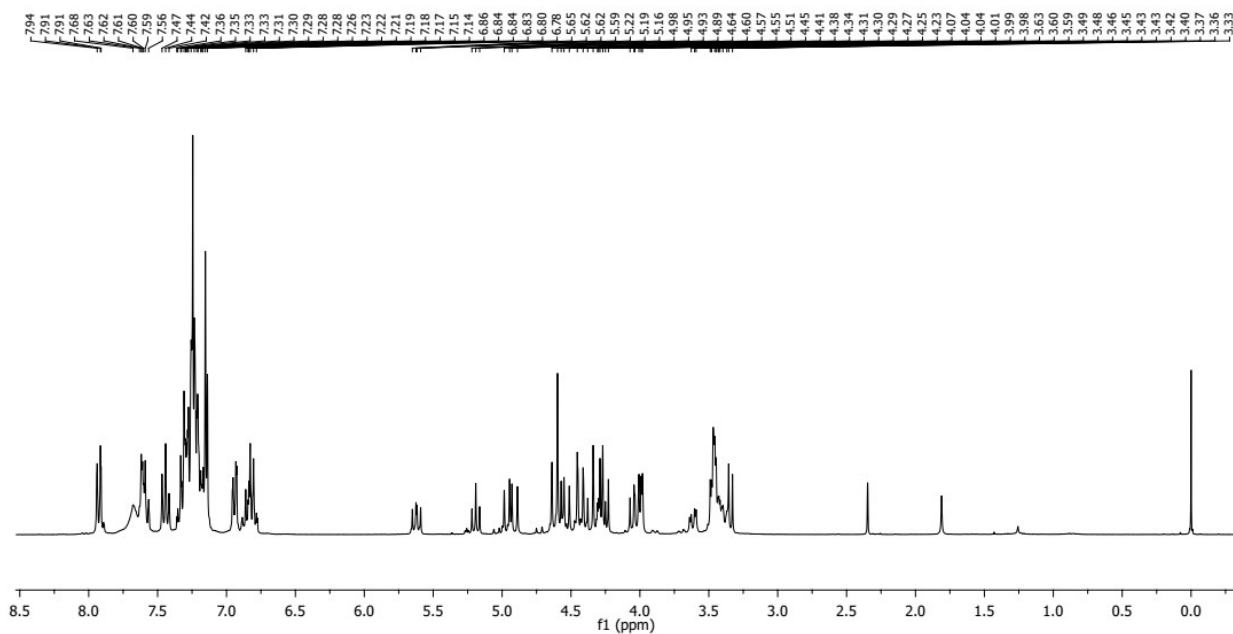

CDCl<sub>3</sub> 300 MHz

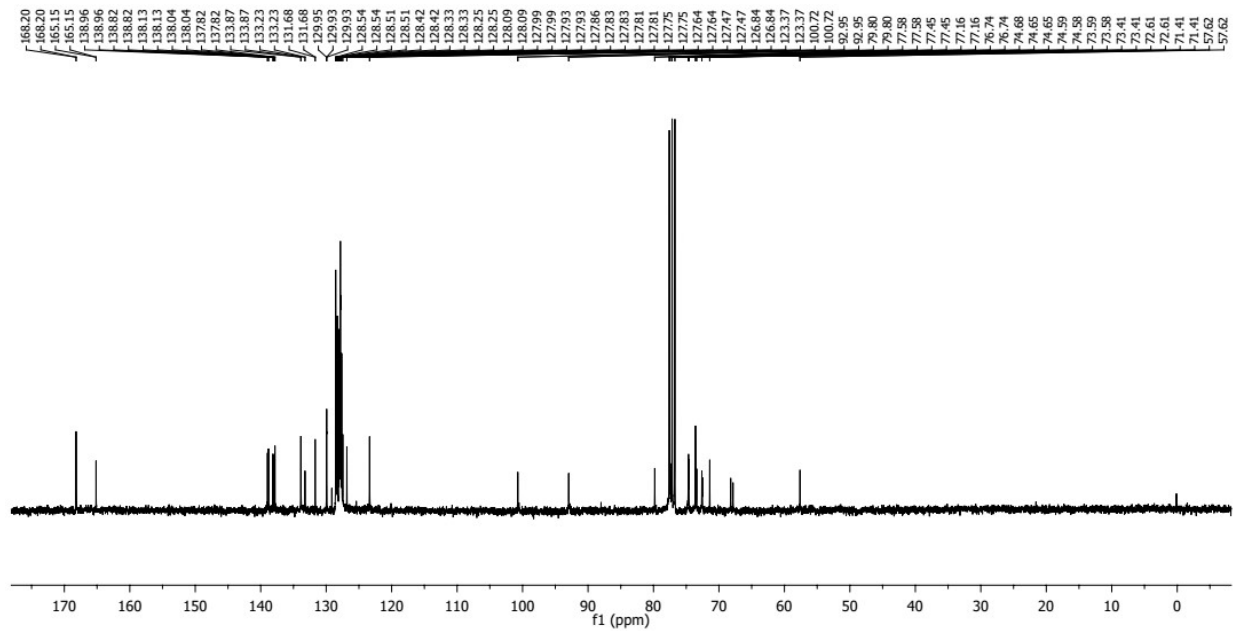

CDCl<sub>3</sub> 75 MHz

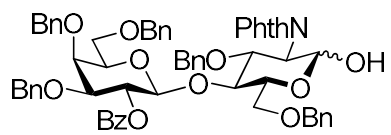

8

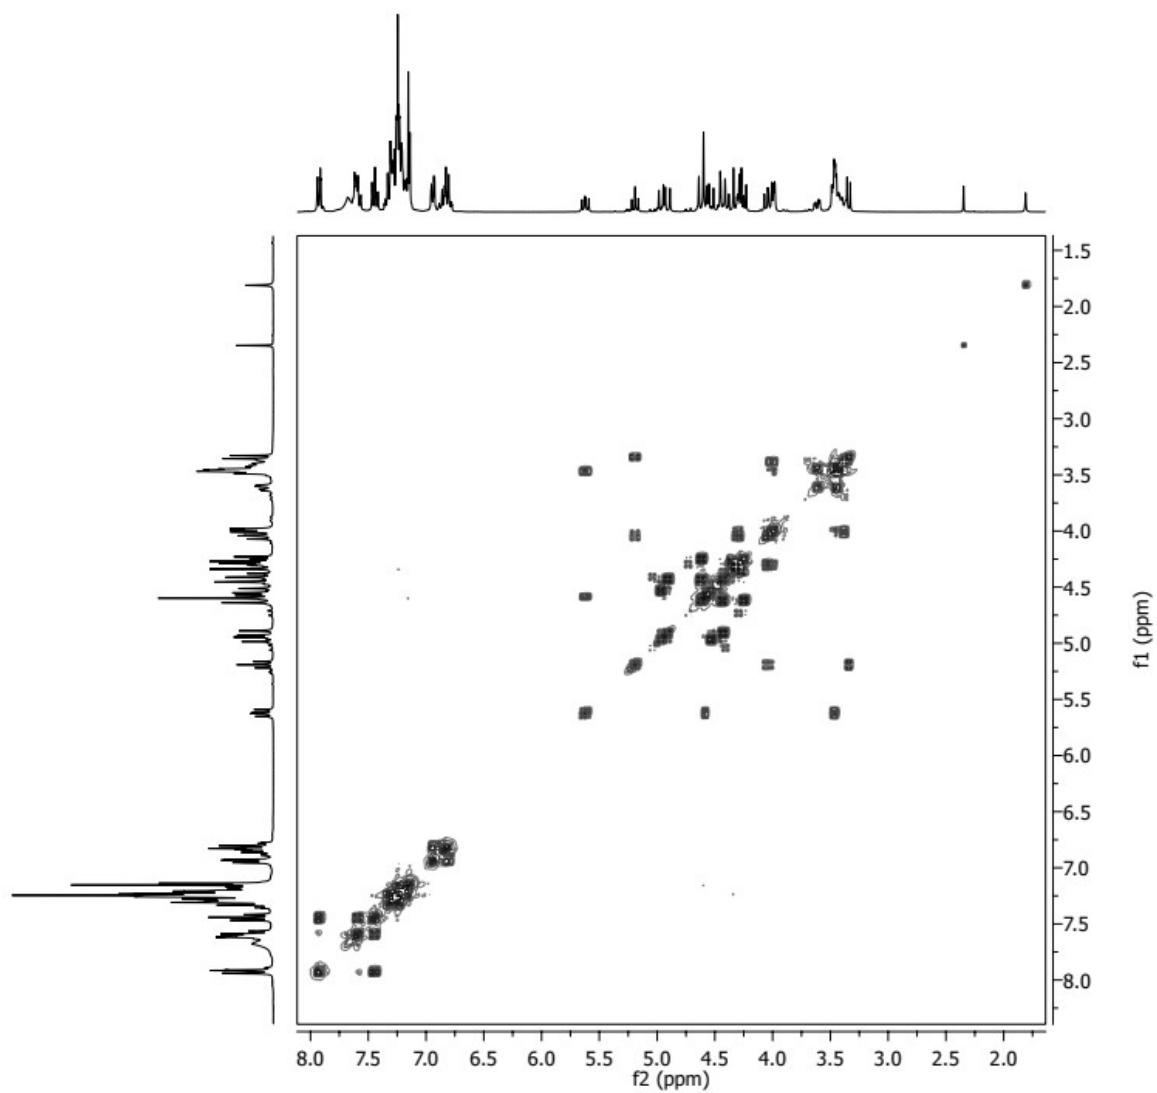

$\text{CDCl}_3$  300 MHz

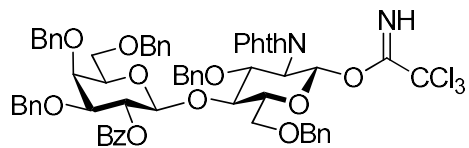

9

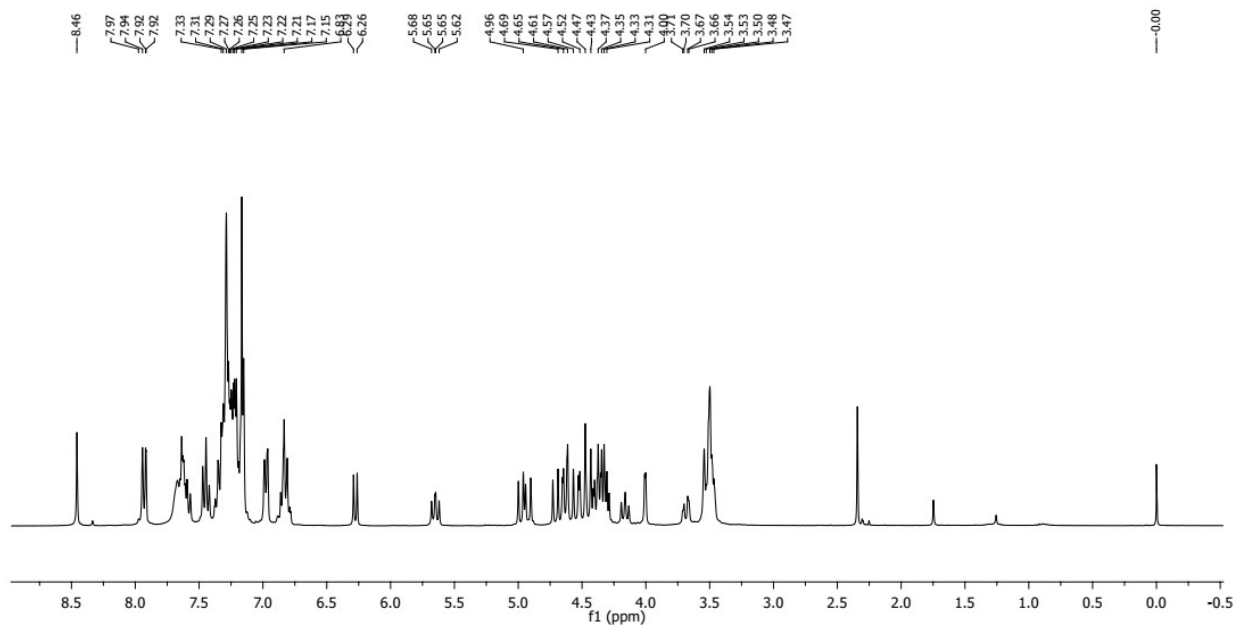

CDCl<sub>3</sub> 300 MHz

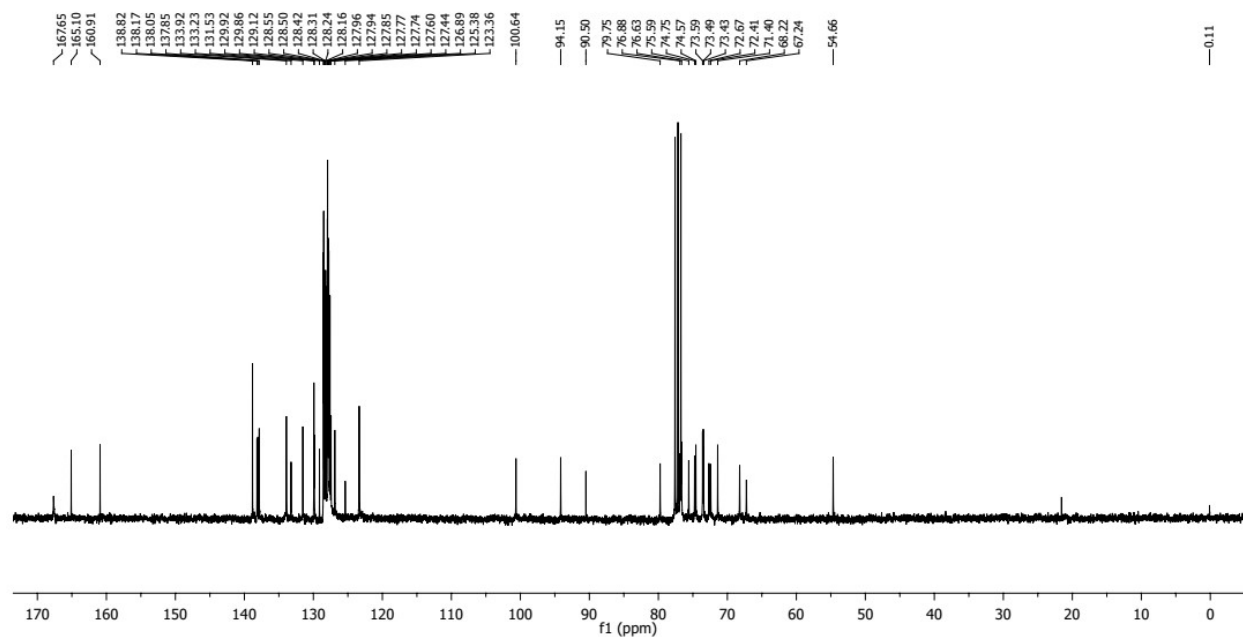

CDCl<sub>3</sub> 75 MHz

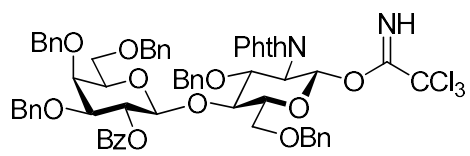

9

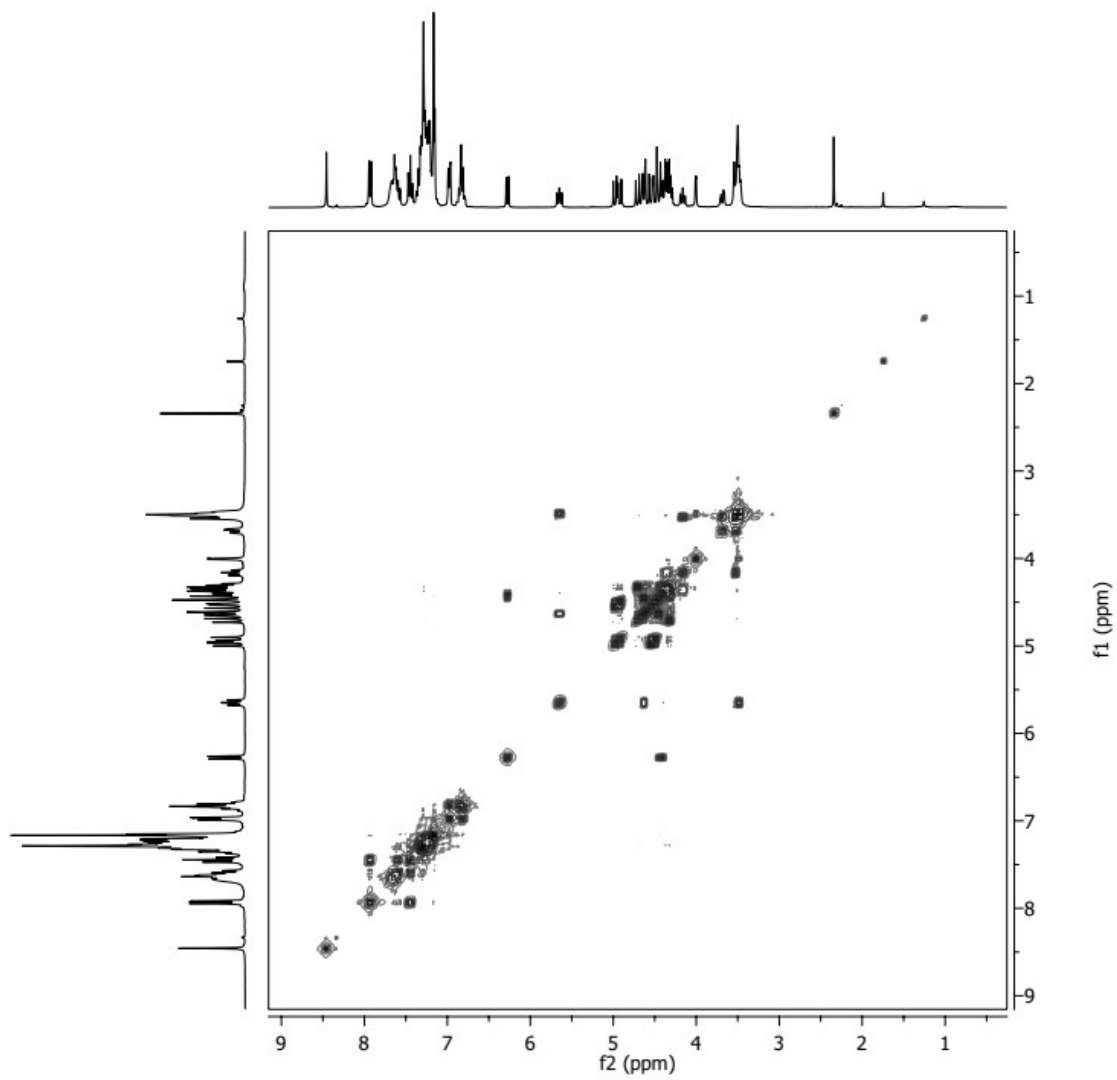

CDCl<sub>3</sub> 300 MHz

10

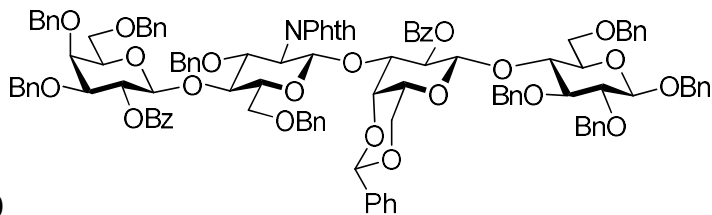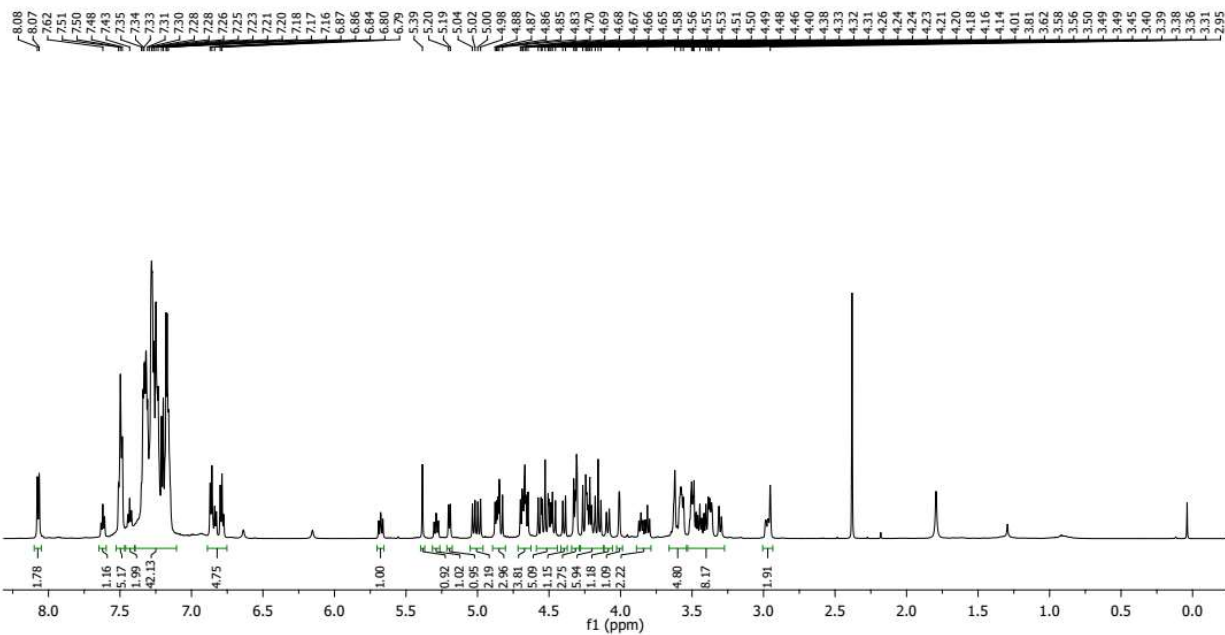

CDCl<sub>3</sub> 600 MHz

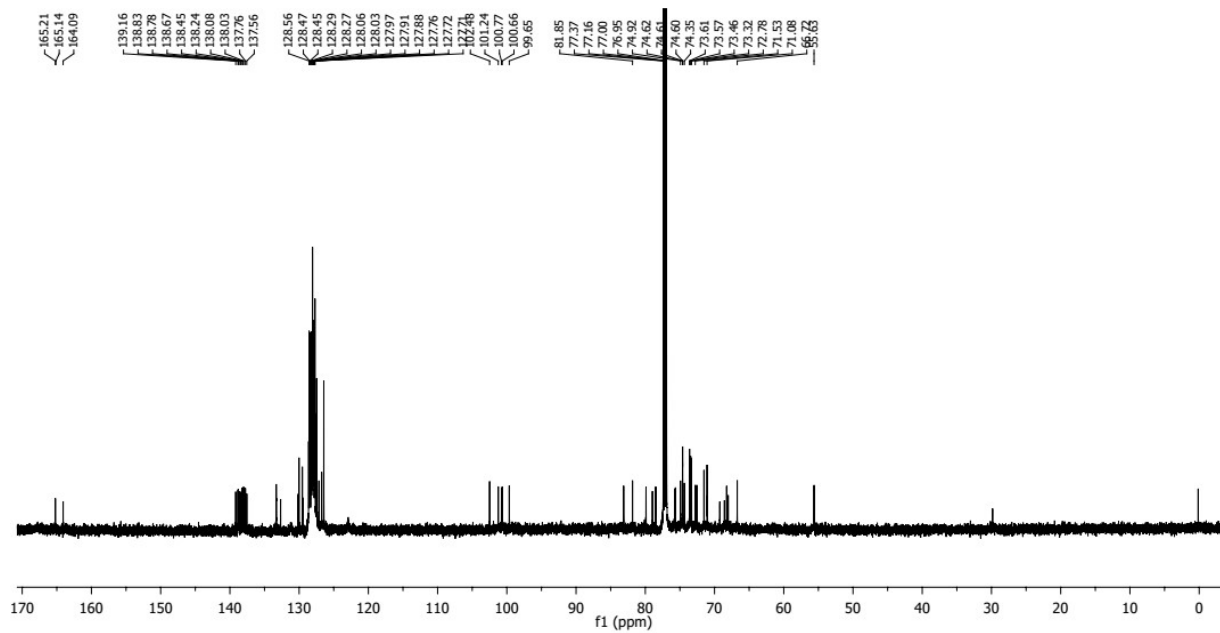

CDCl<sub>3</sub> 151 MHz



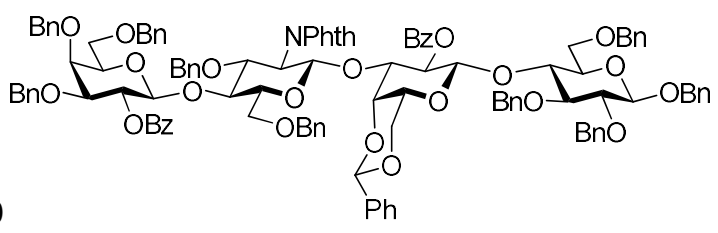

10

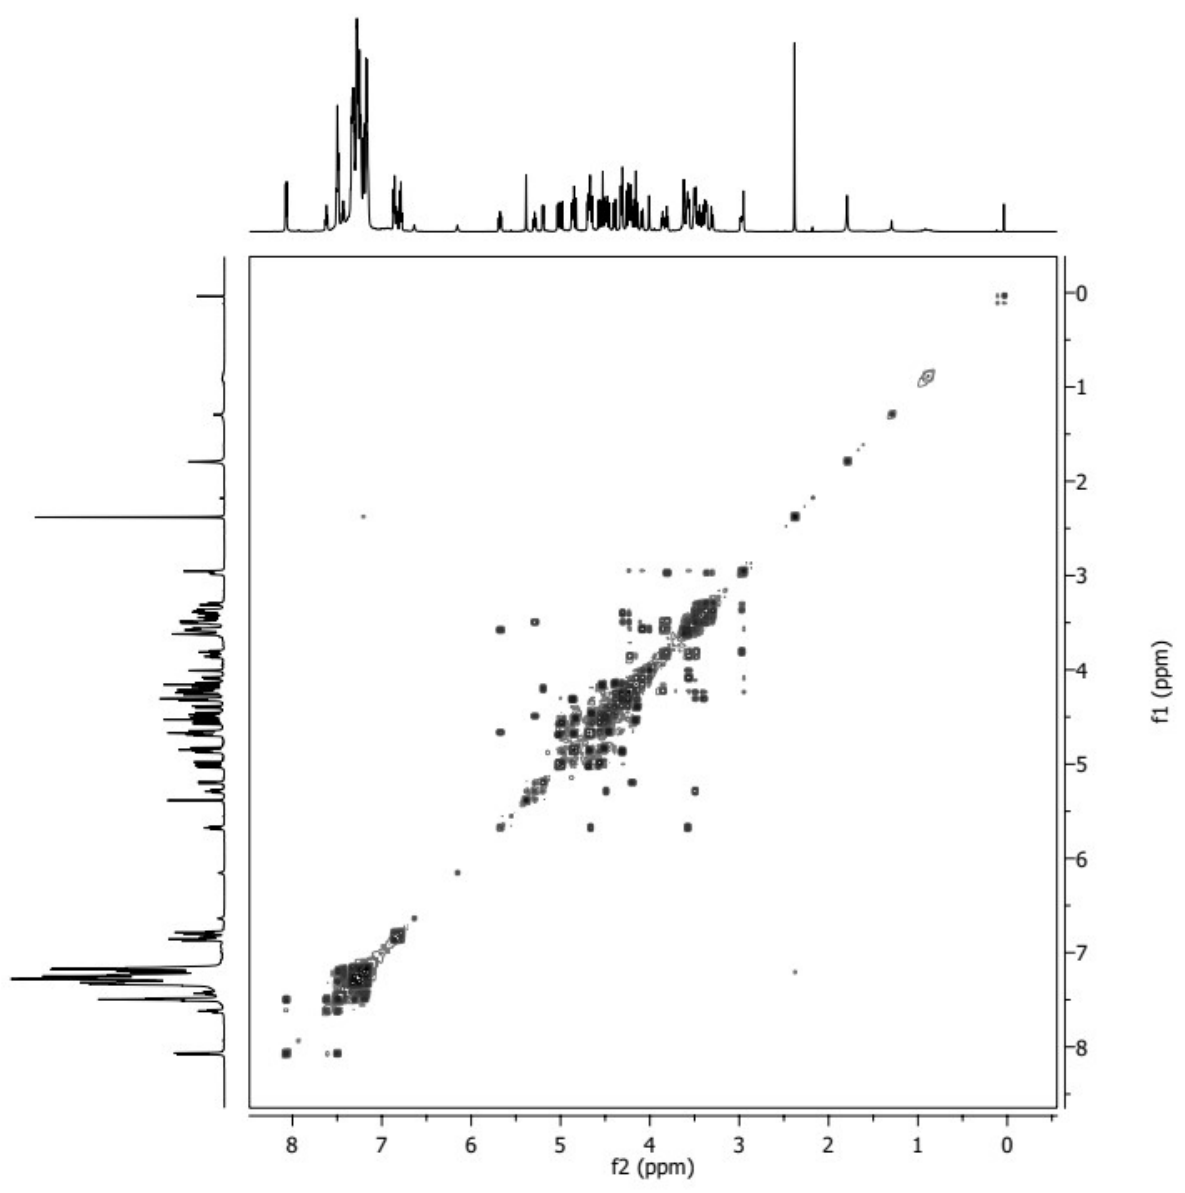

CDCl<sub>3</sub> 600 MHz

11

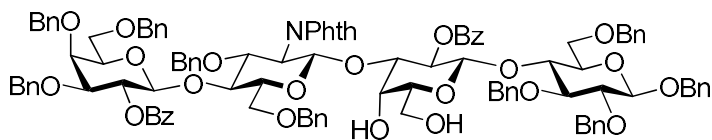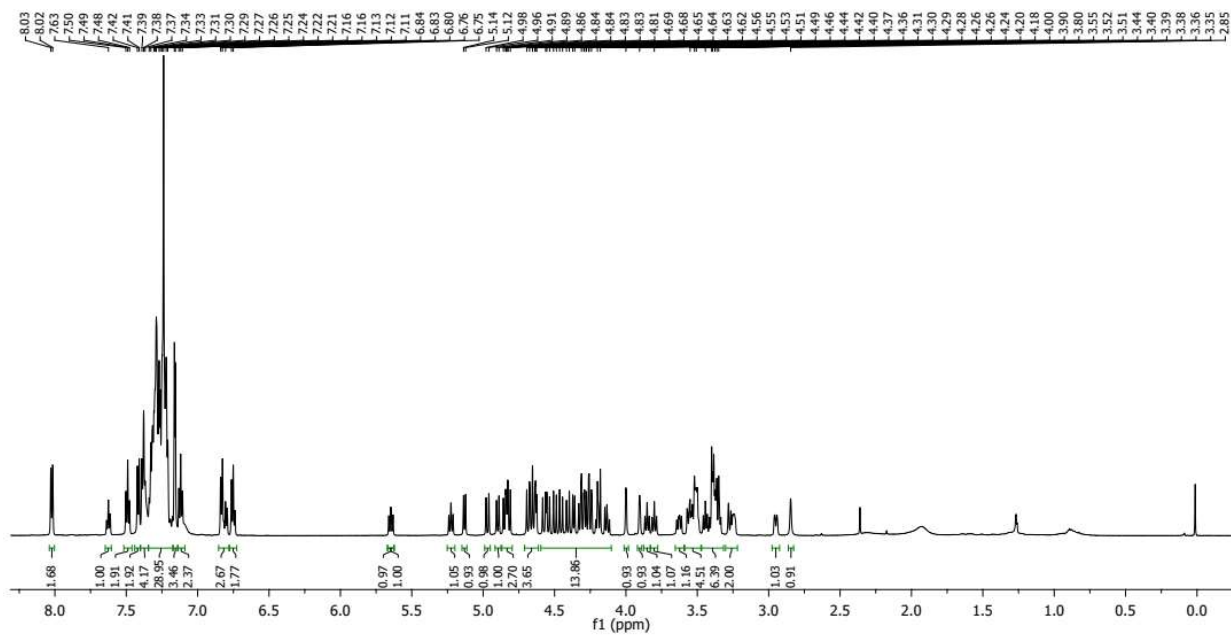

CDCl<sub>3</sub> 600 MHz

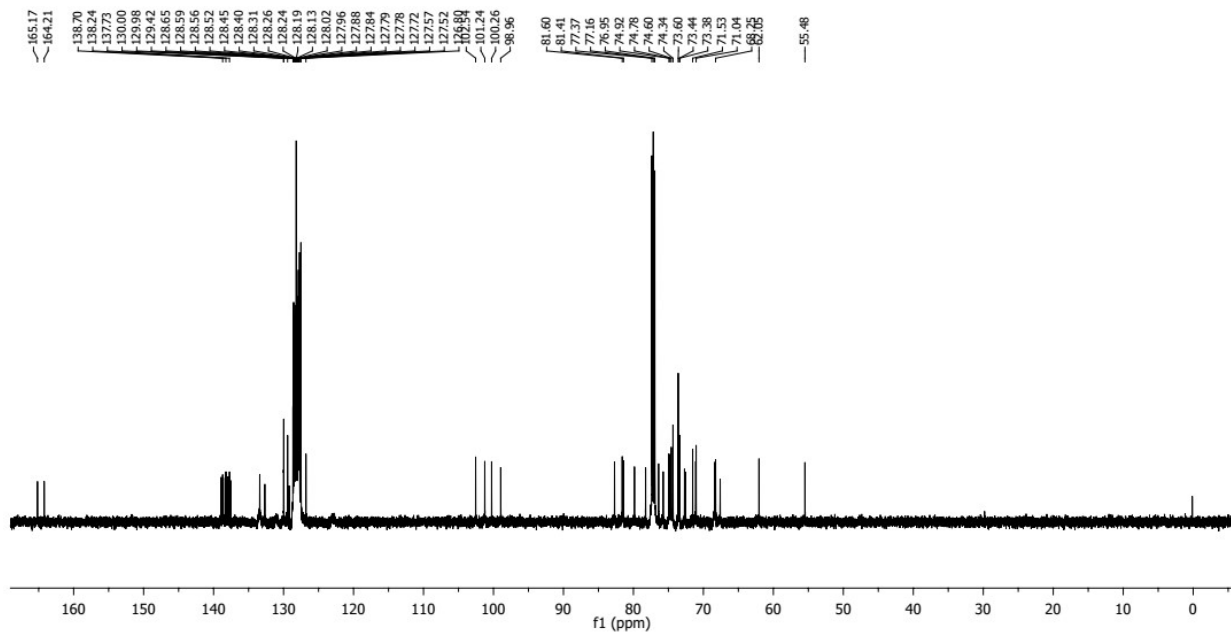

CDCl<sub>3</sub> 151 MHz

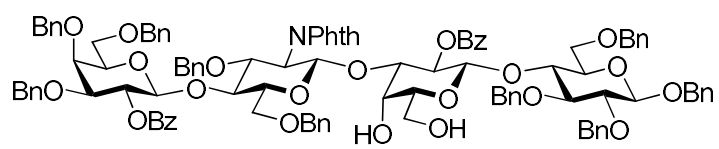

11

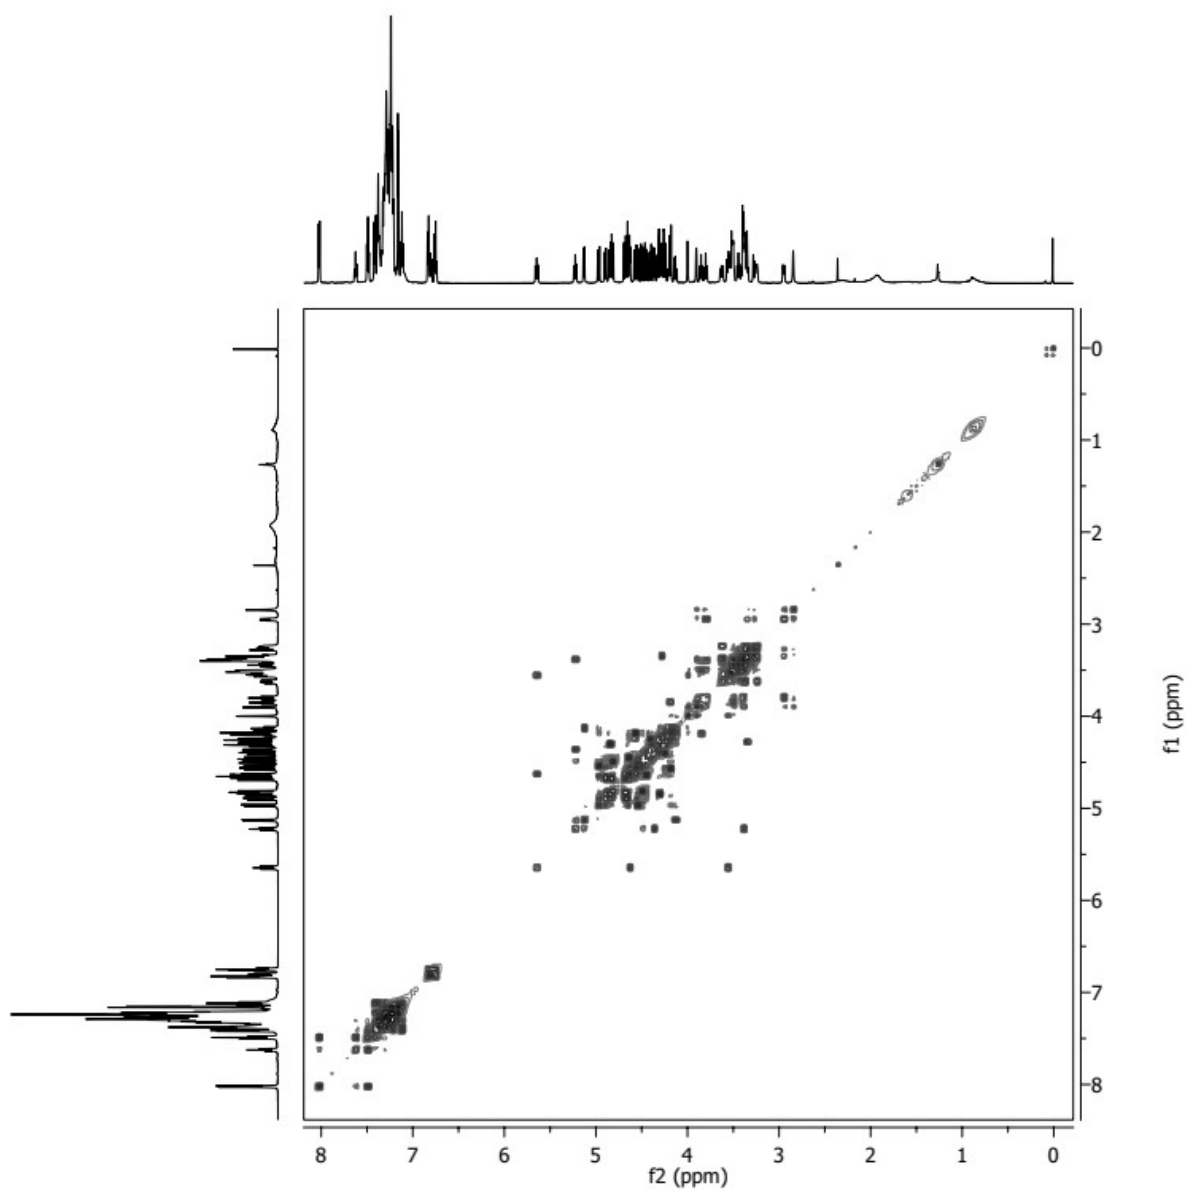

CDCl<sub>3</sub> 600 MHz

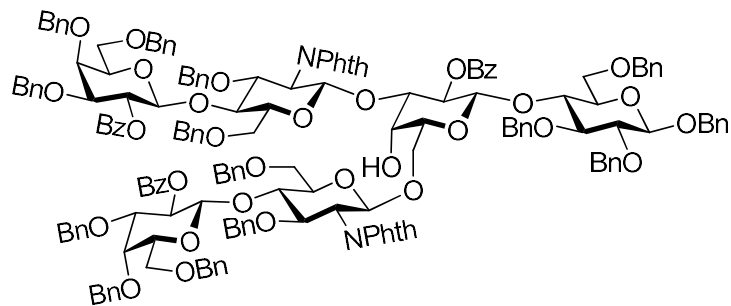

12

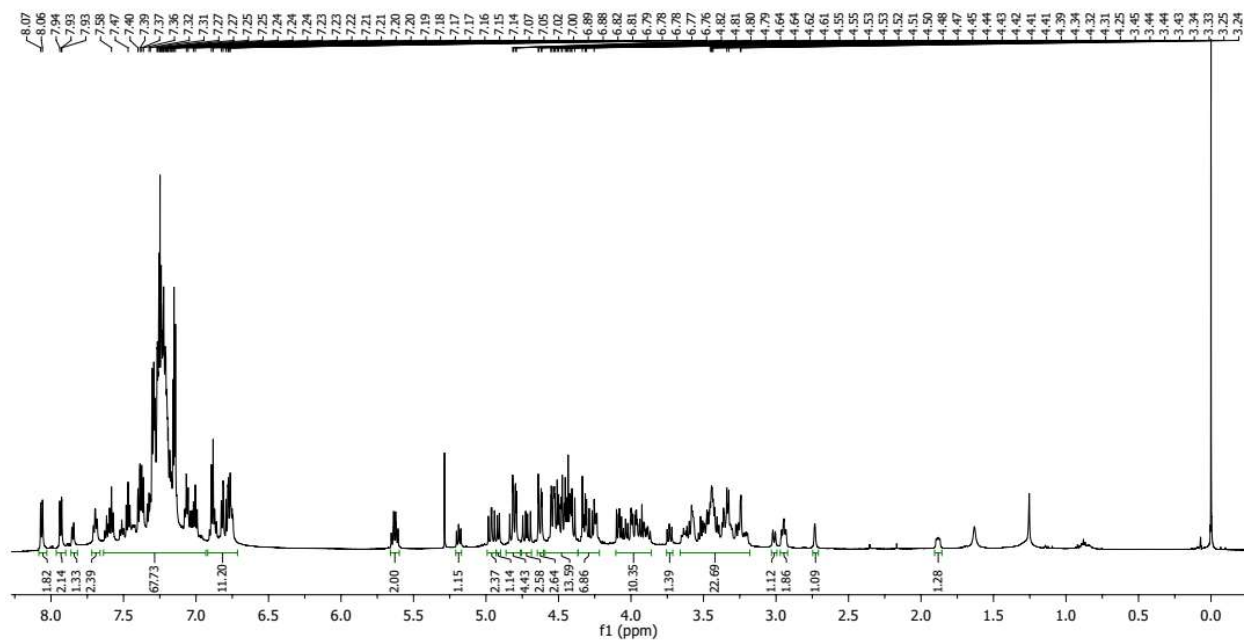

CDCl<sub>3</sub> 600 MHz



12

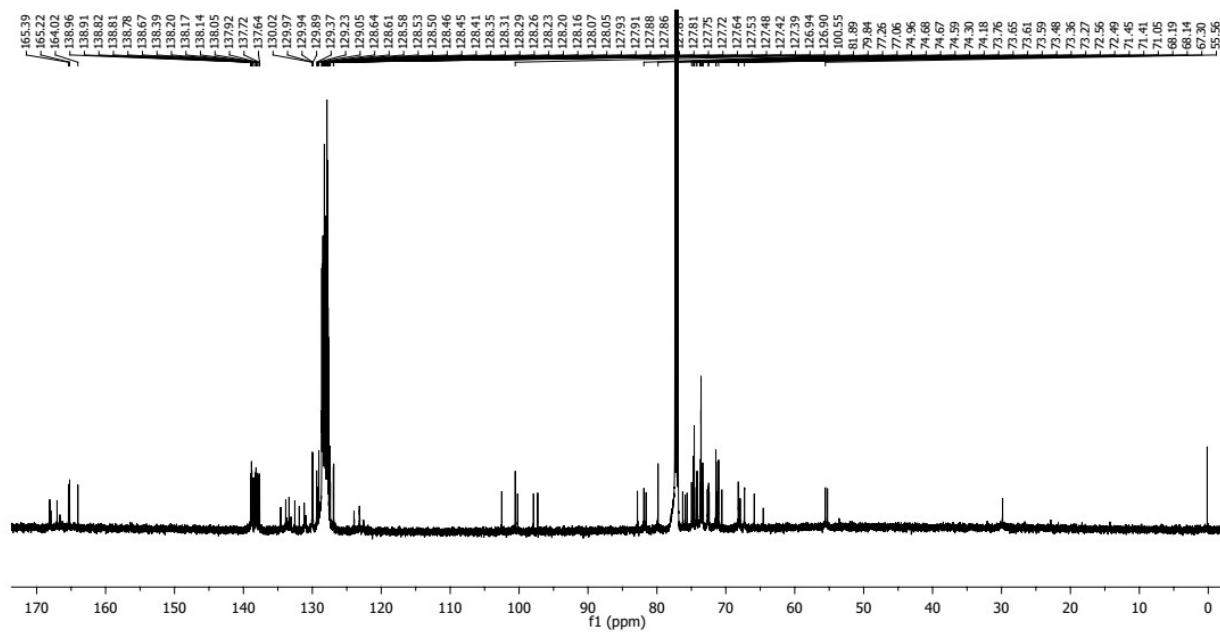

CDCl<sub>3</sub> 151 MHz

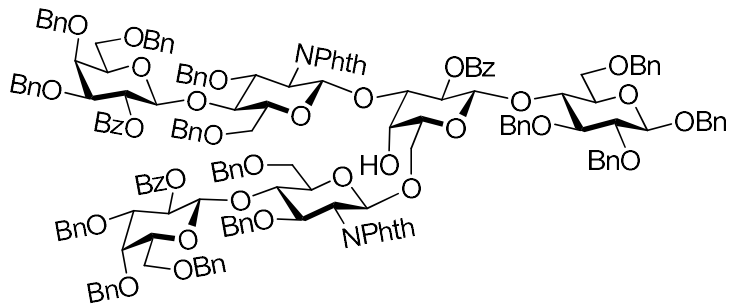

12

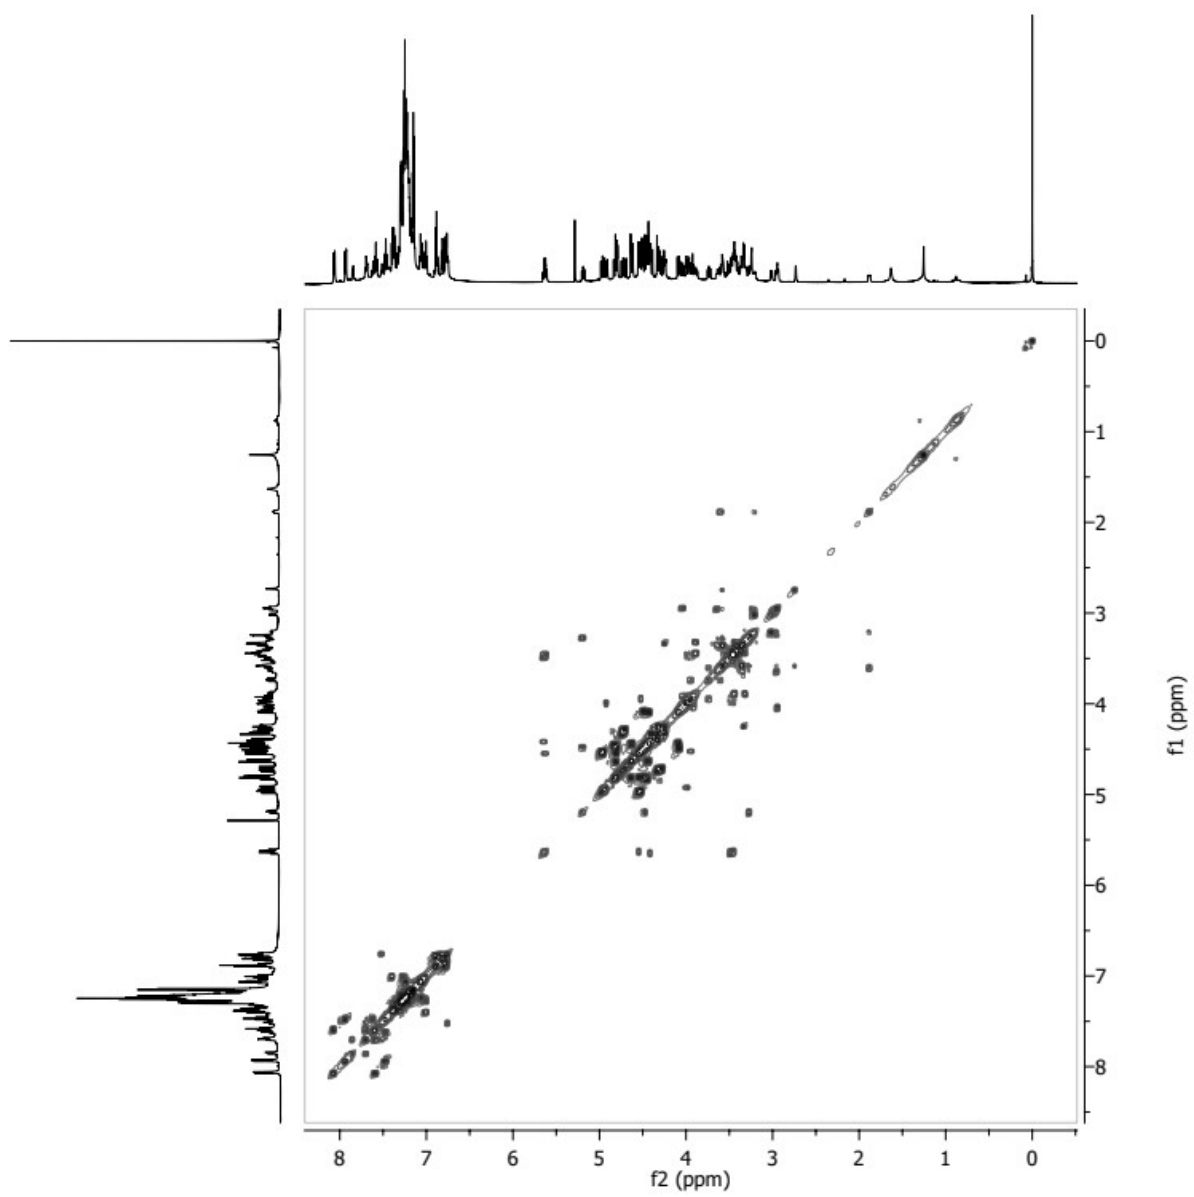

CDCl<sub>3</sub> 600 MHz

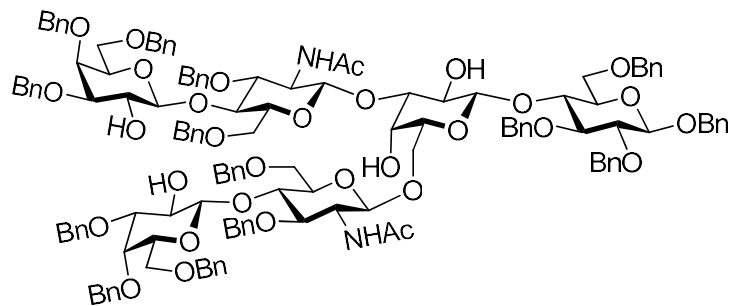

13

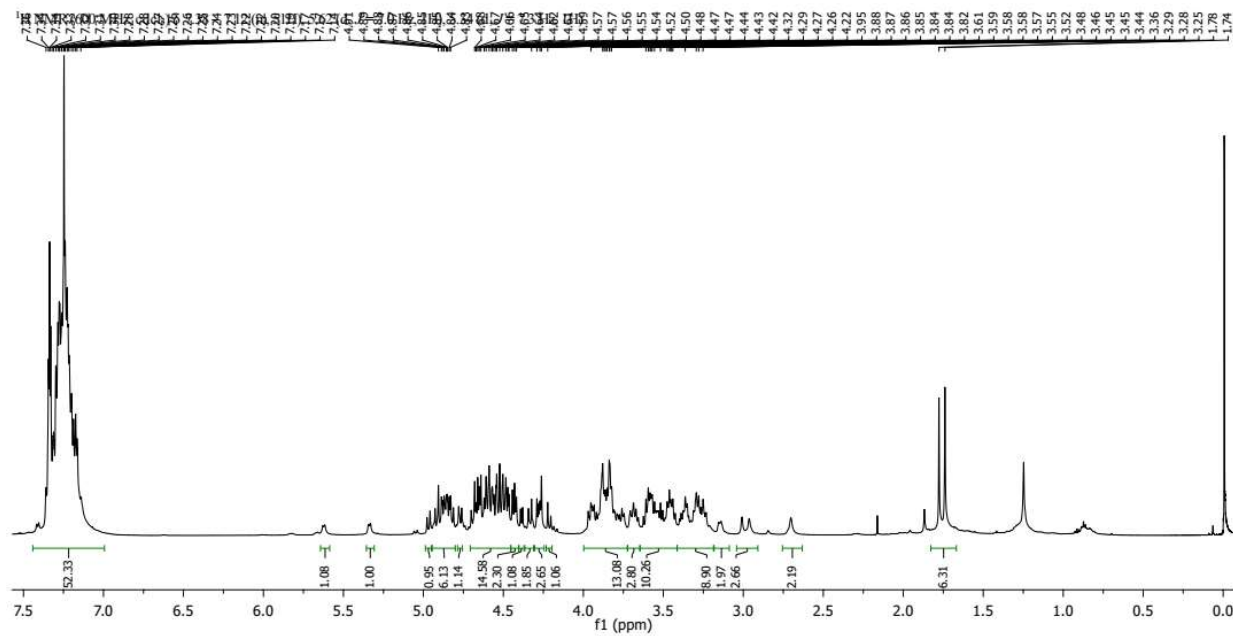

CDCl<sub>3</sub> 600 MHz

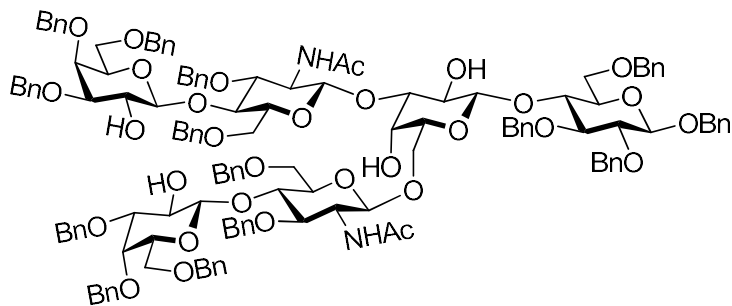

13

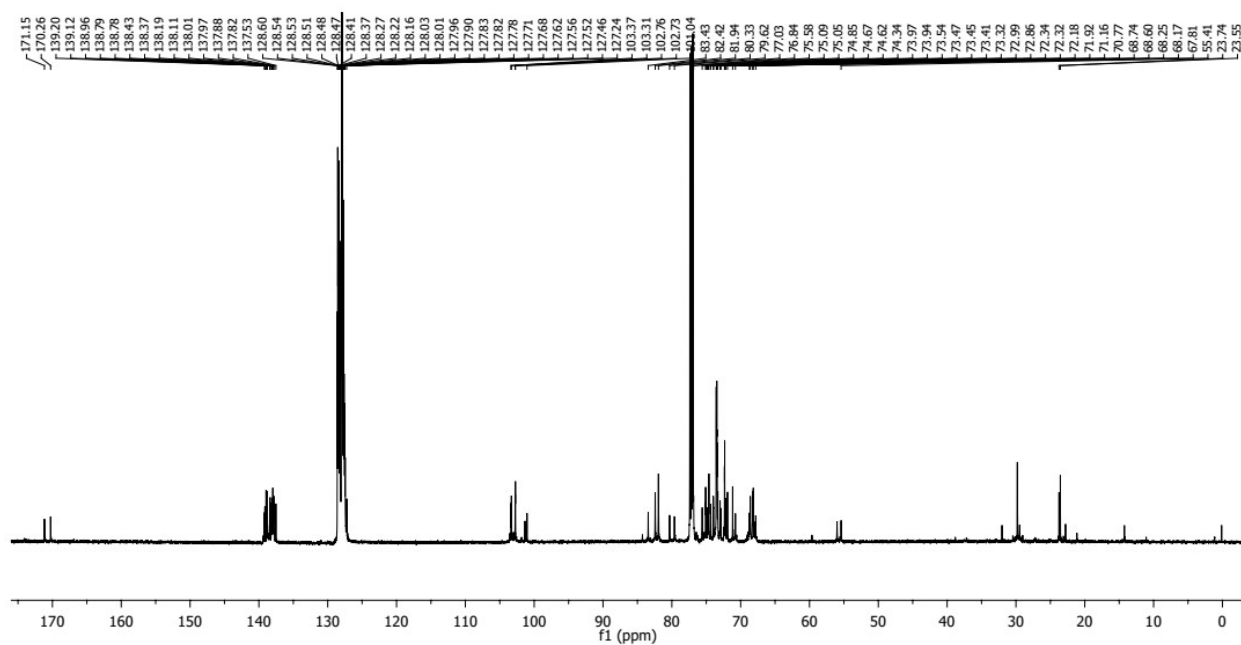

$\text{CDCl}_3$  151 MHz



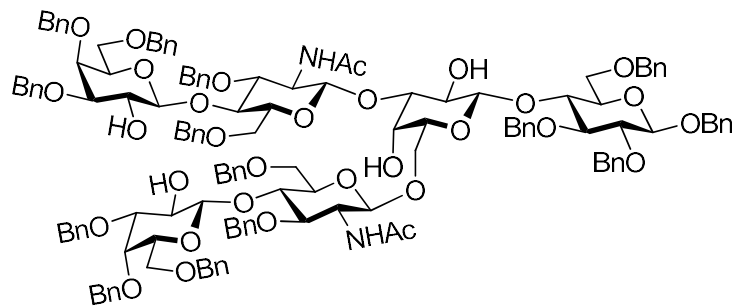

13

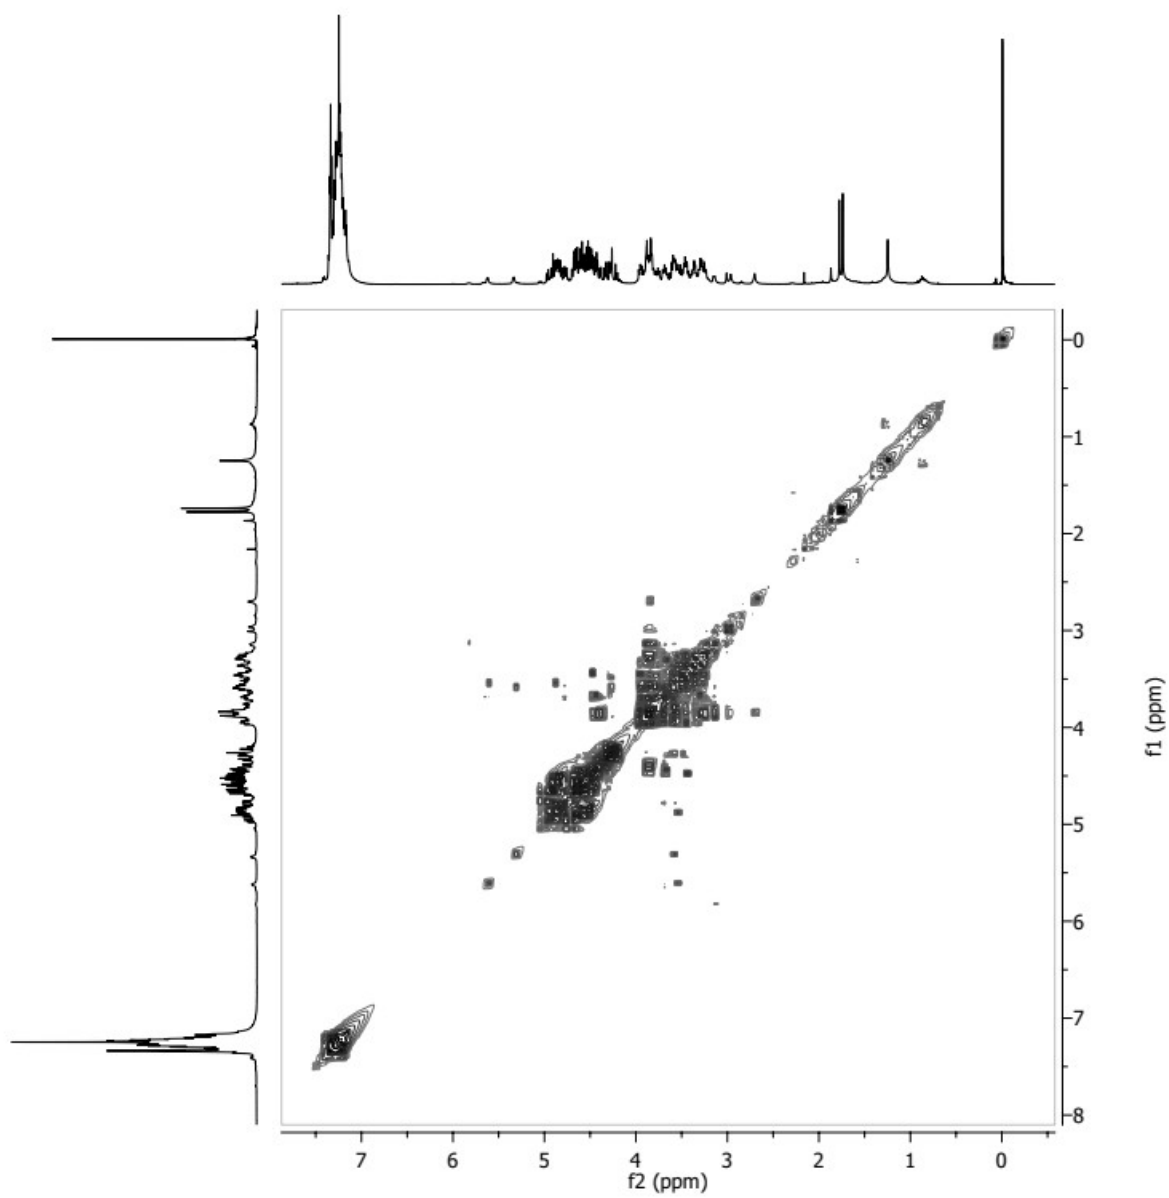

CDCl<sub>3</sub> 600 MHz

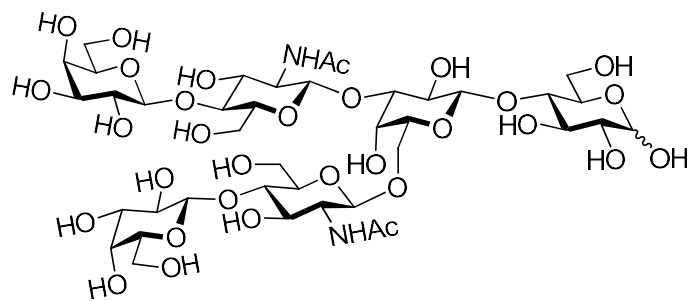

1

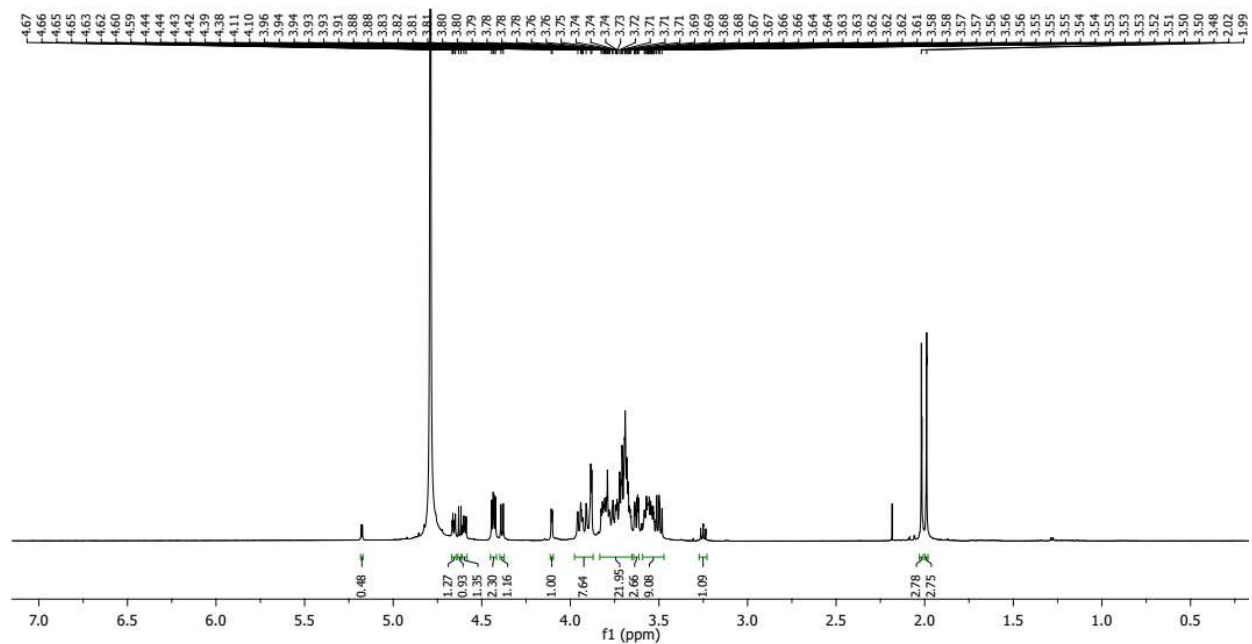

D<sub>2</sub>O 600 MHz



1

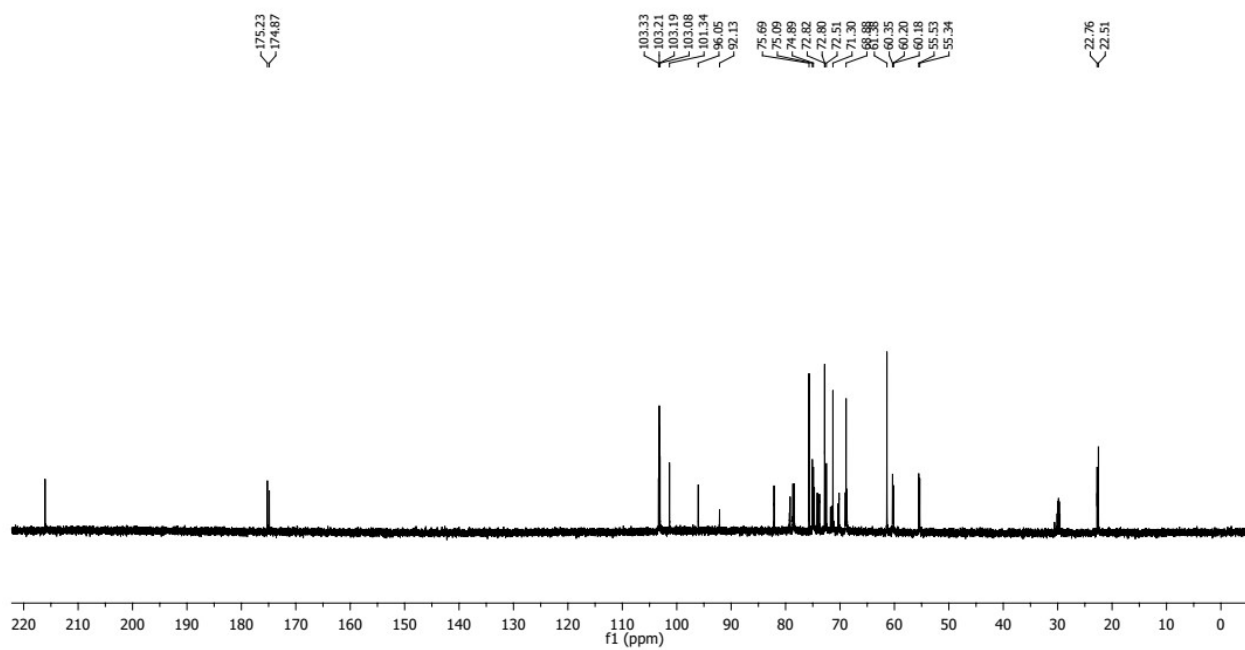

D<sub>2</sub>O 151 MHz

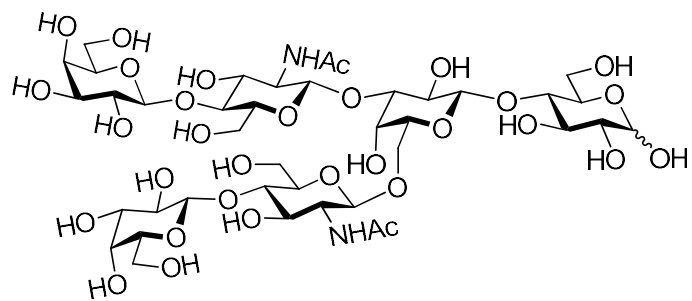

1

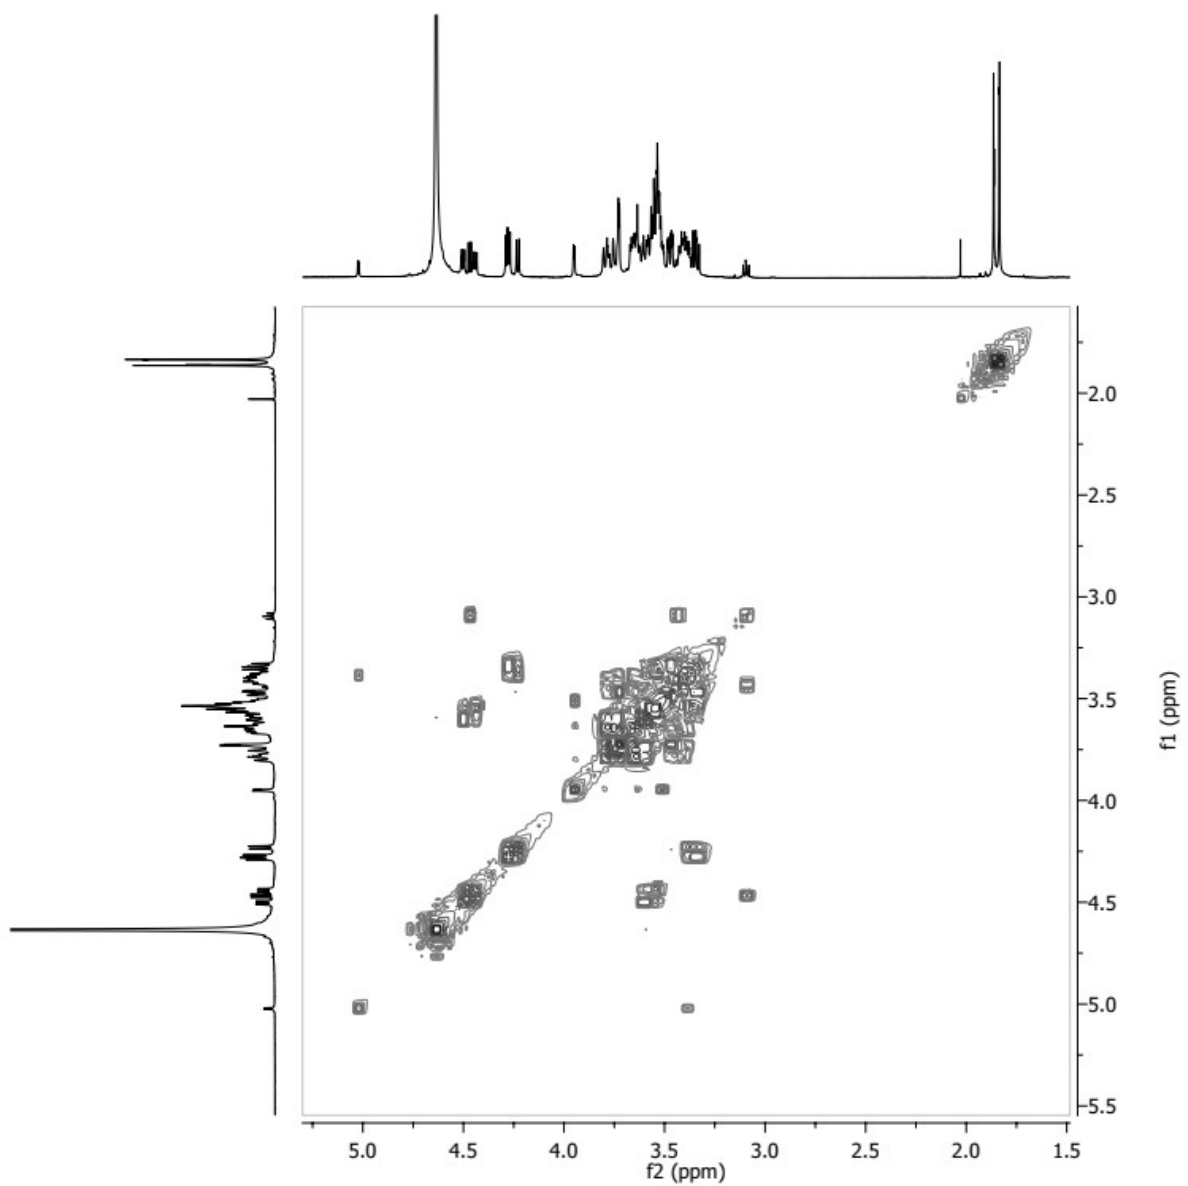

$\text{D}_2\text{O}$  600 MHz

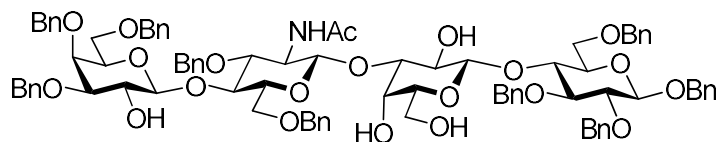

14

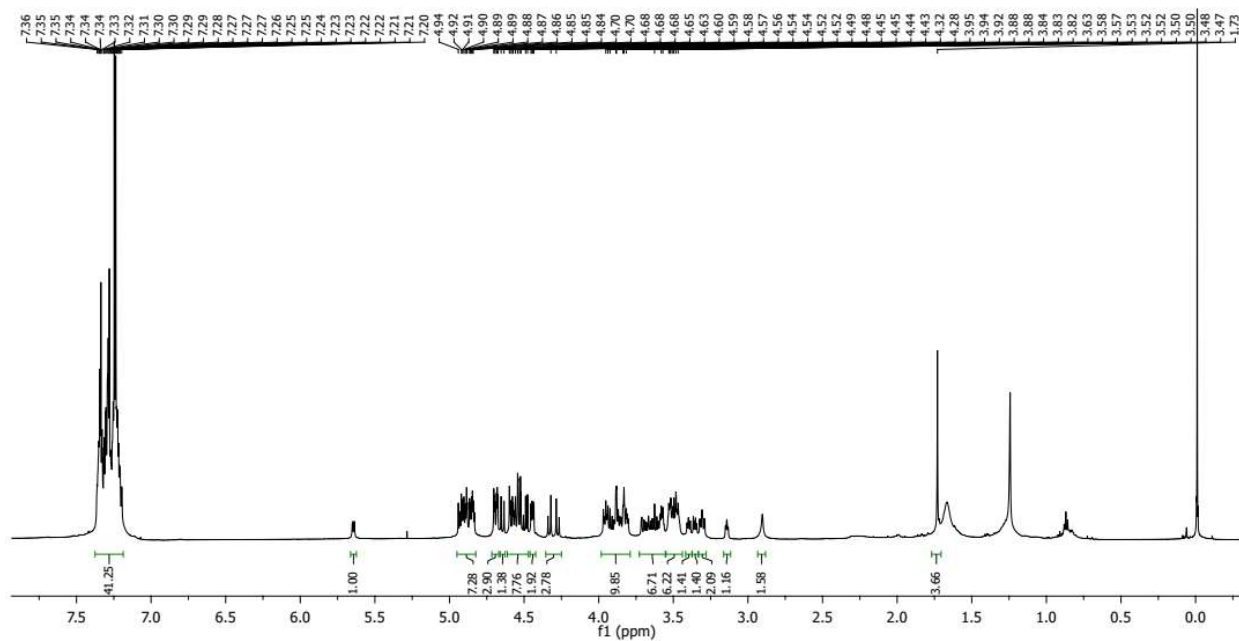

CDCl<sub>3</sub> 600 MHz

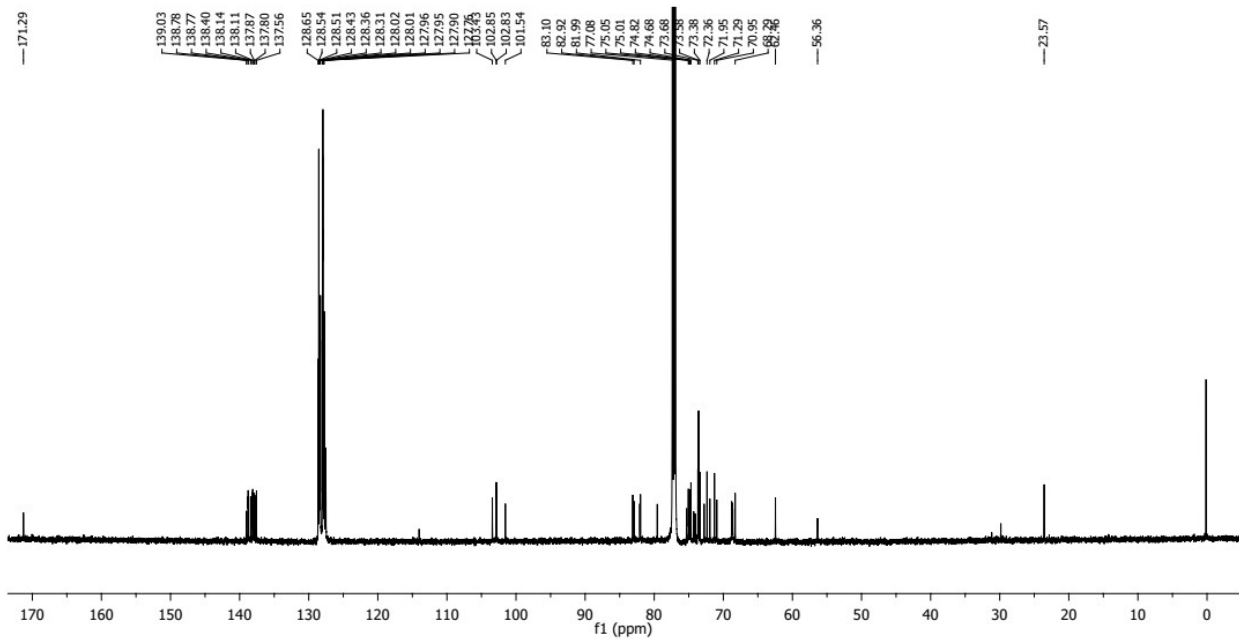

CDCl<sub>3</sub> 151 MHz

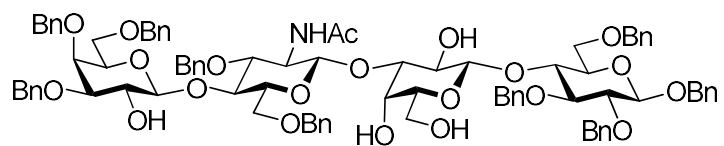

14

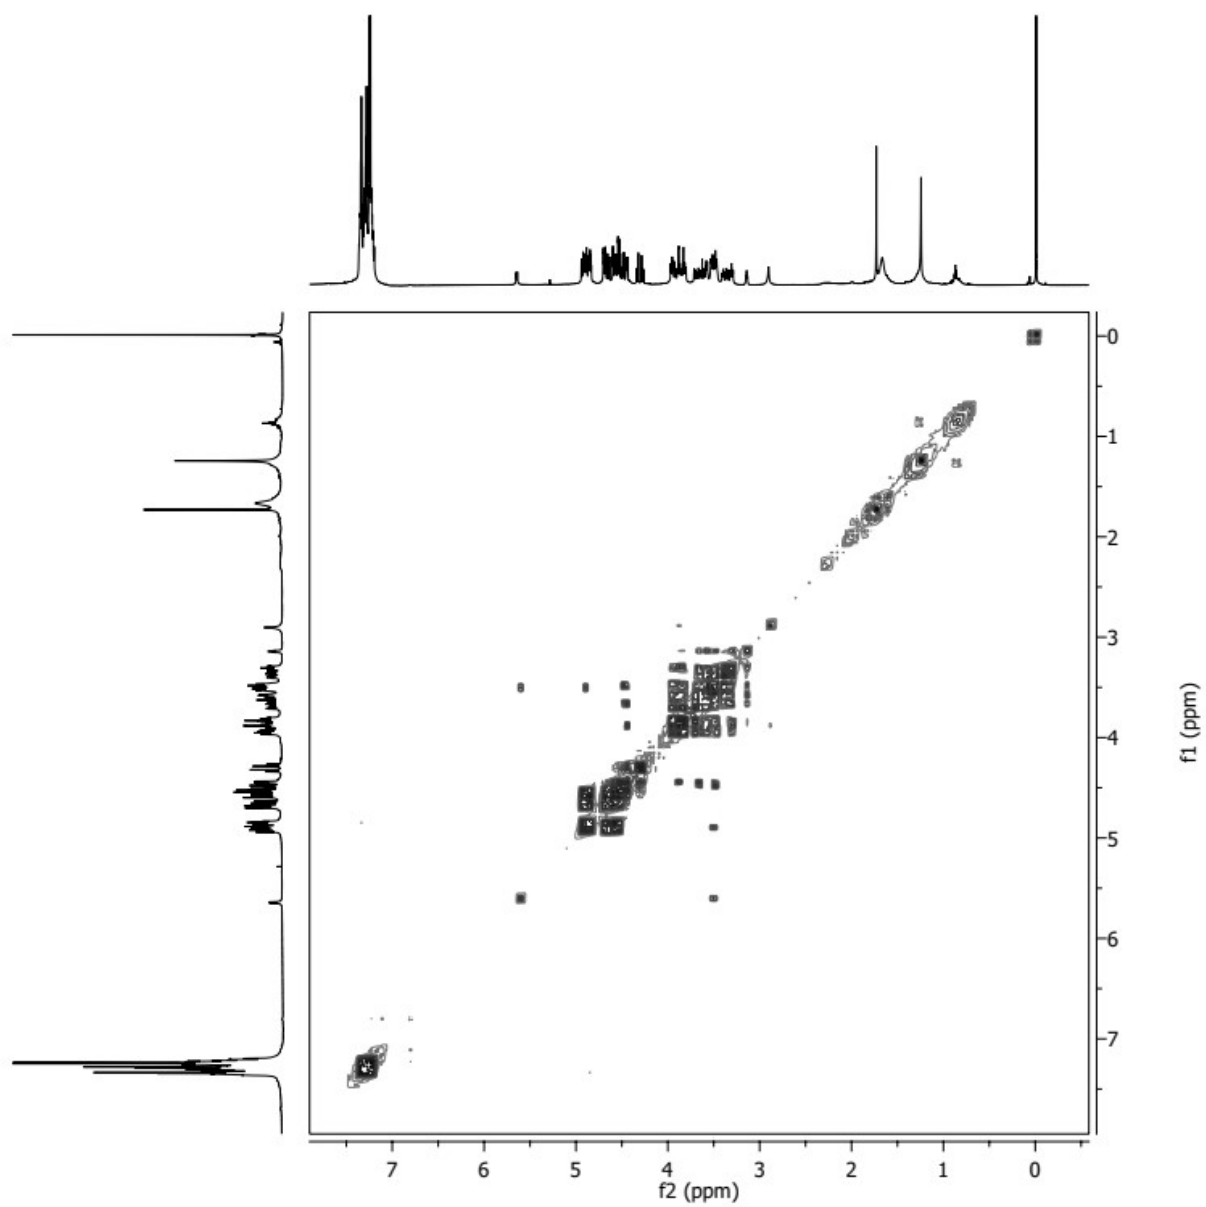

CDCl<sub>3</sub> 600 MHz
